# Supplementary material for: The Association between a Decrease in On-Treatment Neutrophil-to-Eosinophil Ratio (NER) at Week 6 after Ipilimumab Plus Nivolumab Initiation and Improved Clinical Outcomes in Metastatic Renal Cell Carcinoma
Source: MDPI journal article supplement (doi:10.3390/cancers14153830), 2022-08-07
Supplement: s1 [file s1]

**Supplementary table S1: continuous variable analysis for baseline LnNER and week 6 LnNER**

|                               | PFS              |         | OS               |         |
|-------------------------------|------------------|---------|------------------|---------|
|                               | AHR (95%)        | P-value | AHR (95%)        | P-value |
| <b>Baseline LnNER</b>         | 0.98 (0.78-1.23) | 0.84    | 0.82 (0.57-1.19) | 0.30    |
| <b>Week 6 LnNER</b>           | 0.78 (0.66-0.93) | 0.005   | 0.67 (0.52-0.86) | 0.002   |
| <b>Histology</b>              |                  |         |                  |         |
| ccRCC                         | 1.12 (0.64-1.98) | 0.69    | 0.52 (0.24-1.11) | 0.09    |
| nccRCC                        | Ref              |         | Ref              |         |
| <b>Prior Systemic Therapy</b> |                  |         |                  |         |
| Yes                           | 1.86 (1.19-2.91) | 0.006   | 1.37 (0.67-2.82) | 0.39    |
| No                            | Ref              |         | Ref              |         |
| <b>Age</b>                    |                  |         |                  |         |
| ≥60                           | 0.89 (0.58-1.38) | 0.61    | 0.97 (0.48-1.95) | 0.93    |
| <60                           | Ref              |         | Ref              |         |
| <b>Sex</b>                    |                  |         |                  |         |
| Male                          | 1.18 (0.74-1.89) | 0.48    | 1.42 (0.68-2.96) | 0.35    |
| Female                        | Ref              |         | Ref              |         |
| <b>Race</b>                   |                  |         |                  |         |
| White                         | 0.67 (0.36-1.24) | 0.20    | 0.55 (0.22-1.36) | 0.20    |
| Non-White                     | Ref              |         | Ref              |         |
| <b>Nephrectomy</b>            |                  |         |                  |         |
| Yes                           | 0.64 (0.39-1.07) | 0.09    | 0.52 (0.24-1.12) | 0.09    |
| No                            | Ref              |         | Ref              |         |
| <b>IMDC risk</b>              |                  |         |                  |         |
| Poor                          | 2.27 (1.06-4.87) | 0.03    | 5.60 (1.69-18.6) | 0.005   |
| Intermediate                  | 1.85 (1.07-3.20) | 0.03    | 2.21 (0.80-6.05) | 0.12    |
| Favorable                     | Ref              |         | Ref              |         |

**Supplementary table S2: categorical variable analysis for week 6 NER change**

|                               | PFS              |         | OS               |         |
|-------------------------------|------------------|---------|------------------|---------|
|                               | AHR (95%)        | P-value | AHR (95%)        | P-value |
| <b>Week 6 NER change</b>      |                  |         |                  |         |
| Decrease >50%                 | 0.55 (0.31-0.95) | 0.03    | 0.37 (0.16-0.84) | 0.02    |
| Decrease ≤50%                 | 0.63 (0.38-1.05) | 0.07    | 0.49 (0.23-1.06) | 0.07    |
| Increase                      | Ref              |         | Ref              |         |
| <b>Histology</b>              |                  |         |                  |         |
| ccRCC                         | 1.11 (0.61-2.00) | 0.74    | 0.54 (0.24-1.20) | 0.13    |
| nccRCC                        | Ref              |         | Ref              |         |
| <b>Prior Systemic Therapy</b> |                  |         |                  |         |
| Yes                           | 1.78 (1.14-2.76) | 0.01    | 1.22 (0.59-2.52) | 0.59    |
| No                            | Ref              |         | Ref              |         |
| <b>Age</b>                    |                  |         |                  |         |
| ≥60                           | 0.86 (0.55-1.33) | 0.49    | 0.93 (0.47-1.86) | 0.84    |
| <60                           | Ref              |         | Ref              |         |
| <b>Sex</b>                    |                  |         |                  |         |
| Male                          | 1.14 (0.72-1.81) | 0.57    | 1.35 (0.65-2.78) | 0.42    |
| Female                        | Ref              |         | Ref              |         |
| <b>Race</b>                   |                  |         |                  |         |
| White                         | 0.68 (0.36-1.26) | 0.22    | 0.60 (0.24-1.50) | 0.28    |
| Non-White                     | Ref              |         | Ref              |         |
| <b>Nephrectomy</b>            |                  |         |                  |         |
| Yes                           | 0.67 (0.40-1.13) | 0.13    | 0.53 (0.24-1.15) | 0.11    |
| No                            | Ref              |         | Ref              |         |
| <b>IMDC risk</b>              |                  |         |                  |         |
| Poor                          | 2.07 (0.97-4.40) | 0.06    | 5.44 (1.65-18.0) | 0.005   |
| Intermediate                  | 1.71 (0.99-2.95) | 0.05    | 2.23 (0.80-6.22) | 0.13    |
| Favorable                     | Ref              |         | Ref              |         |

**Supplementary table S3: categorical variable analysis for week 6 NER change in subgroup with high baseline NER**

|                               | PFS              |         | OS               |         |
|-------------------------------|------------------|---------|------------------|---------|
|                               | AHR (95%)        | P-value | AHR (95%)        | P-value |
| <b>Week 6 NER change</b>      |                  |         |                  |         |
| Decrease >50%                 | 0.46 (0.22-1.00) | 0.048   | 0.28 (0.11-0.74) | 0.01    |
| Decrease ≤50%                 | 0.59 (0.26-1.31) | 0.19    | 0.44 (0.16-1.23) | 0.12    |
| Increase                      | Ref              |         | Ref              |         |
| <b>Histology</b>              |                  |         |                  |         |
| ccRCC                         | 1.38 (0.57-3.37) | 0.48    | 0.62 (0.22-1.75) | 0.37    |
| nccRCC                        | Ref              |         | Ref              |         |
| <b>Prior Systemic Therapy</b> |                  |         |                  |         |
| Yes                           | 2.60 (1.38-4.91) | 0.003   | 1.05 (0.41-2.72) | 0.92    |
| No                            | Ref              |         | Ref              |         |
| <b>Age</b>                    |                  |         |                  |         |
| ≥60                           | 0.36 (0.19-0.70) | 0.003   | 0.53 (0.21-1.32) | 0.17    |
| <60                           | Ref              |         | Ref              |         |
| <b>Sex</b>                    |                  |         |                  |         |
| Male                          | 1.10 (0.57-2.11) | 0.78    | 0.88 (0.38-2.06) | 0.77    |
| Female                        | Ref              |         | Ref              |         |
| <b>Race</b>                   |                  |         |                  |         |
| White                         | 0.71 (0.28-1.81) | 0.47    | 0.55 (0.17-1.76) | 0.31    |
| Non-White                     | Ref              |         | Ref              |         |
| <b>Nephrectomy</b>            |                  |         |                  |         |
| Yes                           | 0.62 (0.31-1.22) | 0.17    | 0.64 (0.26-1.60) | 0.34    |
| No                            | Ref              |         | Ref              |         |
| <b>IMDC risk</b>              |                  |         |                  |         |
| Poor                          | 5.07 (1.38-18.6) | 0.01    | NE               |         |
| Intermediate                  | 2.55 (0.88-7.36) | 0.08    | NE               |         |
| Favorable                     | Ref              |         | Ref              |         |

NE: not-estimable due to small number of events

**Supplementary table S4: categorical variable analysis for week 6 NER change in subgroup with low baseline NER**

|                               | PFS              |         | OS               |         |
|-------------------------------|------------------|---------|------------------|---------|
|                               | AHR (95%)        | P-value | AHR (95%)        | P-value |
| <b>Week 6 NER change</b>      |                  |         |                  |         |
| Decrease >50%                 | 0.58 (0.22-1.48) | 0.25    | 0.60 (0.08-4.30) | 0.61    |
| Decrease ≤50%                 | 0.72 (0.34-1.53) | 0.39    | 1.08 (0.25-4.70) | 0.92    |
| Increase                      | Ref              |         | Ref              |         |
| <b>Histology</b>              |                  |         |                  |         |
| ccRCC                         | 0.95 (0.31-2.96) | 0.94    | 0.20 (0.04-1.10) | 0.06    |
| nccRCC                        | Ref              |         | Ref              |         |
| <b>Prior Systemic Therapy</b> |                  |         |                  |         |
| Yes                           | 2.03 (0.94-4.38) | 0.07    | 1.76 (0.40-7.69) | 0.45    |
| No                            | Ref              |         | Ref              |         |
| <b>Age</b>                    |                  |         |                  |         |
| ≥60                           | 1.85 (0.91-3.76) | 0.09    | 2.23 (0.52-9.62) | 0.28    |
| <60                           | Ref              |         | Ref              |         |
| <b>Sex</b>                    |                  |         |                  |         |
| Male                          | 1.09 (0.47-2.54) | 0.84    | 1.69 (0.18-16.1) | 0.65    |
| Female                        | Ref              |         | Ref              |         |
| <b>Race</b>                   |                  |         |                  |         |
| White                         | 0.47 (0.17-1.31) | 0.15    | 0.48 (0.05-4.54) | 0.52    |
| Non-White                     | Ref              |         | Ref              |         |
| <b>Nephrectomy</b>            |                  |         |                  |         |
| Yes                           | 0.59 (0.23-1.48) | 0.26    | 0.34 (0.07-1.75) | 0.20    |
| No                            | Ref              |         | Ref              |         |
| <b>IMDC risk</b>              |                  |         |                  |         |
| Poor                          | 1.42 (0.41-4.95) | 0.58    | 1.92 (0.16-23.6) | 0.61    |
| Intermediate                  | 1.82 (0.89-3.73) | 0.10    | 1.60 (0.42-6.08) | 0.49    |
| Favorable                     | Ref              |         | Ref              |         |
